# Supplementary material for: Finding Evidence for Local Transmission of Contagious Disease in Molecular Epidemiological Datasets
Source: PubMed Central journal article supplement (PMC3724731; doi:10.1371/journal.pone.0069875), 2013-07-26

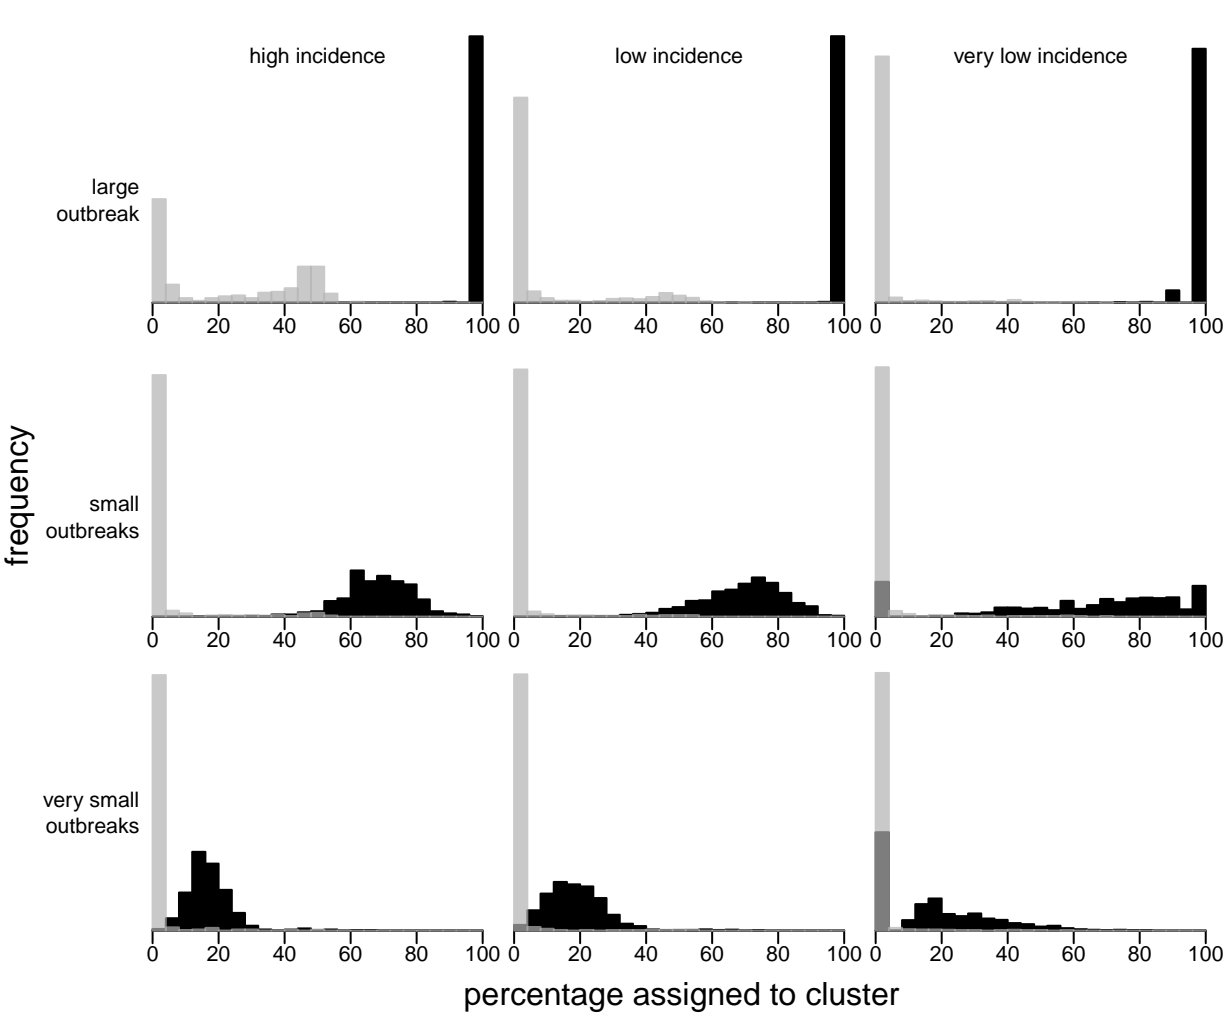

Supplement: pone.0069875.s003.pdf [file pone.0069875.s003.pdf]
